# Supplementary material
Source: bioRxiv or medRxiv preprint supplement (https://medrxiv.org/highwire/filestream/78167/field_highwire_adjunct_files/1/2020.04.21.20073916-2.pdf)
Supplement: Supplementary file [file 2020.04.21.20073916-2.pdf]

## Supplementary Appendix 2

**Table S2. Estimates of LOS reported in the literature**

| Reference, Journal, date of line publication                      | Estimate provided (ALOS, average length of stay; MLOS, median length of stay; IQR, interquartile range)                                                                                      | Summary of important elements relating to the estimate provided                                                                                                                                                                                                                                                   |
|-------------------------------------------------------------------|----------------------------------------------------------------------------------------------------------------------------------------------------------------------------------------------|-------------------------------------------------------------------------------------------------------------------------------------------------------------------------------------------------------------------------------------------------------------------------------------------------------------------|
| Wang et al, <i>Jama</i> , Feb 7 2020 <sup>1</sup>                 | Hospital MLOS [IQR] = 10 days [7.0–14.0] for those who were discharged at the date of last follow-up (n = 47 out of the 138 patients of the series, including 25 out of the 36 ICU patients) | Monocentre study (Wuhan, China). 138 consecutive patients admitted from Jan 1 to Jan 28 2020. Last date of follow-up was Feb 3. At this date, of the 36 patients admitted to the ICU, 11 were still in the ICU, 9 had been discharged to home, 10 had been transferred to the general wards, and 6 had died.      |
| Yang et al, <i>Lancet Respir Med</i> , Feb 21 2020 <sup>2</sup>   | ICU MLOS in patients who died = 7 days                                                                                                                                                       | Monocentre (Wuhan, China): 52 patients admitted to the ICU between late December 2019 and January 26 2020. At the date of last follow-up, February 3 2020, there were 32 deaths and 20 survivors among which 12 were not discharged.                                                                              |
| Guan et al, <i>New Engl J Med</i> , Feb 28 2020 <sup>3</sup>      | Hospital MLOS [IQR] of severe patients: 13 days [11.5–17]                                                                                                                                    | Multicentric China. National data of hospitalized patients between Dec 1 and Jan 29. At the date of last follow-up, January 31, 1029 out of the 1099 patients included in the study were still hospitalized (93%), and 154 out of the 173 patients (89%) categorized as severe were still hospitalized            |
| Cao et al, <i>Intensive Care Med</i> , Mar 2 2020 <sup>4</sup>    | ICU MLOS = 11 days for patients who survived (n = 12), ICU MLOS = 4 days for the patients who died (n = 6)                                                                                   | Monocentre (Wuhan, China): 18 patients transferred to the ICU out of 102 patients hospitalized between January 3 and February 1, 2020. At the date of last follow-up February 15, the 102 patients were discharged.                                                                                               |
| Zhou et al, <i>Lancet</i> , Mar 9 2020 <sup>5</sup>               | ICU MLOS [IQR] = 8 days [4–12]                                                                                                                                                               | Two centers (Wuhan, China), 51 ICU patients admitted at hospital between December 29 2019 and January 31 2020, and discharged before Jan 31 out of 813 patients admitted at hospital before January 31.                                                                                                           |
| IHME COVID-19 team <i>Medrxiv</i> , Mar 30 2020 <sup>6</sup>      | ICU MLOS = 8 days                                                                                                                                                                            | Modelling study. Zhou et al                                                                                                                                                                                                                                                                                       |
| Moghadas et al <i>PNAS</i> Apr 03 2020 <sup>7</sup>               | ICU ALOS = 13.25 days for survivors<br>ICU ALOS = 7 days for patients dying in the ICU                                                                                                       | Modelling study. Authors indicate that the ICU ALOS for survivors was based on ventilation data reported by Chen et al and Wang et al, while ICU ALOS for patients dying in the ICU is derived from Yang et al (n.b., 7 days was reported as the MLOS, not as the ALOS).                                          |
| Grasselli et al, <i>Jama</i> , April 6 2020 <sup>8</sup>          | ICU MLOS = 9 days considering all patients,<br>ICU MLOS = 10 days for those still in the ICU<br>ICU MLOS = 8 days for those discharged<br>ICU MLOS = 7 days for those who died               | ICU network of 72 hospitals in Lombardy Italy. 1591 admitted to the ICU between February 20 and March 18, 2020. At the date of final follow-up, March 25, 920 patients (58%) were still in the ICU, 256 patients had been discharged alive (16%), and 405 (25%) patients had died, 10 patients with missing data. |
| Weissman et al, <i>Ann Intern Med</i> , April 7 2020 <sup>9</sup> | ICU ALOS = 8 days                                                                                                                                                                            | Modelling study. ICU ALOS from Hill's model ( <a href="https://alhill.shinyapps.io/COVID19seir/">https://alhill.shinyapps.io/COVID19seir/</a> ) which source is Zhou et al (n.b., 8 days was reported as the MLOS, not as the ALOS)                                                                               |

### References

1. Wang D, Hu B, Hu C, et al. Clinical Characteristics of 138 Hospitalized Patients With 2019 Novel Coronavirus-Infected Pneumonia in Wuhan, China. *JAMA* 2020.
2. Yang X, Yu Y, Xu J, et al. Clinical course and outcomes of critically ill patients with SARS-CoV-2 pneumonia in Wuhan, China: a single-centered, retrospective, observational study. *The Lancet Respiratory Medicine* 2020.
3. Guan WJ, Ni ZY, Hu Y, et al. Clinical Characteristics of Coronavirus Disease 2019 in China. *The New England journal of medicine* 2020.

4. Cao J, Hu X, Cheng W, Yu L, Tu WJ, Liu Q. Clinical features and short-term outcomes of 18 patients with corona virus disease 2019 in intensive care unit. *Intensive Care Medicine* 2020.
5. Zhou F, Yu T, Du R, et al. Clinical course and risk factors for mortality of adult inpatients with COVID-19 in Wuhan, China: a retrospective cohort study. *Lancet (London, England)* 2020; **395**(10229): 1054-62.
6. Institute for Health Metrics and Evaluation - COVID-19 health service utilization forecasting team, Christopher JL Murray CJL. Forecasting COVID-19 impact on hospital bed-days, ICU-days, ventilator-days and deaths by US state in the next 4 months. *MedRxiv* 2020; **2020.03.27.20043752**.
7. Moghadas SM, Shoukat A, Fitzpatrick MC, et al. Projecting hospital utilization during the COVID-19 outbreaks in the United States. *Proc Natl Acad Sci U S A* 2020.
8. Grasselli G, Zangrillo A, Zanella A, et al. Baseline Characteristics and Outcomes of 1591 Patients Infected With SARS-CoV-2 Admitted to ICUs of the Lombardy Region, Italy. *JAMA* 2020.
9. Weissman GE, Crane-Droesch A, Chivers C, et al. Locally Informed Simulation to Predict Hospital Capacity Needs During the COVID-19 Pandemic. *Annals of Internal Medicine* 2020.
